# Supplementary material for: Germline Genetic Risk Variants for Progressive Multifocal Leukoencephalopathy
Source: PubMed Central journal article supplement (PMC7094807; doi:10.3389/fneur.2020.00186), 2020-03-17
Supplement: Data_Sheet_2.pdf [file Data_Sheet_2.pdf]

## *Supplementary Material*

### **1 Supplementary Tables**

**SUPPLEMENTARY TABLE 1** | Candidate list of 669 immune function genes.

**SUPPLEMENTARY TABLE 2** | Variant burden filtering criteria and results for 669 immune function genes or all genes.

**SUPPLEMENTARY TABLE 3** | Comparison of statistical analyses for the combined PML cohorts using four control data sets.

**SUPPLEMENTARY TABLE 4** | Functional impact of PML-associated variant burden variants and immune dysfunction evidence.

**SUPPLEMENTARY TABLE 1** | Candidate list of 669 immune function genes\*

| <b>Gene symbol</b> | <b>IUIS table</b> | <b>Gene symbol</b> | <b>IUIS table</b> | <b>Gene symbol</b> | <b>IUIS table</b> | <b>Gene symbol</b> | <b>IUIS table</b> |
|--------------------|-------------------|--------------------|-------------------|--------------------|-------------------|--------------------|-------------------|
| <i>ACADM</i>       | other             | <i>CXCL9</i>       | other             | <i>LARP4B</i>      | other             | <i>RIPK3</i>       | other             |
| <i>ACD</i>         | other             | <i>CXCR1</i>       | other             | <i>LAT</i>         | 1                 | <i>RLTPR</i>       | 4                 |
| <i>ACKR1</i>       | other             | <i>CXCR3</i>       | other             | <i>LCK</i>         | 1                 | <i>RNASE3</i>      | other             |
| <i>ACP5</i>        | 7                 | <i>CXCR4</i>       | 6                 | <i>LCP2</i>        | other             | <i>RNASEH2A</i>    | 7                 |
| <i>ACTB</i>        | 5                 | <i>CXorf40A</i>    | other             | <i>LIG1</i>        | 2                 | <i>RNASEH2B</i>    | 7                 |
| <i>ACTN4</i>       | other             | <i>CYBA</i>        | 5                 | <i>LIG4</i>        | 1                 | <i>RNASEH2C</i>    | 7                 |
| <i>ADA</i>         | 1                 | <i>CYBB</i>        | 5, 6              | <i>LPIN2</i>       | 7                 | <i>RNASEL</i>      | other             |
| <i>ADA2</i>        | 7                 | <i>CYP2S1</i>      | other             | <i>LRBA</i>        | 4                 | <i>RNF125</i>      | other             |
| <i>ADAM17</i>      | 7                 | <i>DCLRE1B</i>     | 2                 | <i>LRRK2</i>       | other             | <i>RNF168</i>      | 2                 |
| <i>ADAR</i>        | 7                 | <i>DCLRE1C</i>     | 1                 | <i>LYST</i>        | 4                 | <i>RNF31</i>       | 2                 |
| <i>ADARB1</i>      | other             | <i>DDX1</i>        | other             | <i>MAGEA9B</i>     | other             | <i>RORC</i>        | 6                 |
| <i>ADGRL2</i>      | other             | <i>DDX58</i>       | 7                 | <i>MAGT1</i>       | 4                 | <i>RPSA</i>        | 6                 |
| <i>ADK</i>         | other             | <i>DHX58</i>       | other             | <i>MALL</i>        | other             | <i>RPTOR</i>       | other             |
| <i>AGBL4</i>       | other             | <i>DKC1</i>        | 2                 | <i>MALT1</i>       | 1                 | <i>RSAD2</i>       | other             |
| <i>AICDA</i>       | 3                 | <i>DNAJC21</i>     | 5                 | <i>MAP3K14</i>     | 1                 | <i>RTEL1</i>       | 2                 |
| <i>AIRE</i>        | 4, 9              | <i>DNASE1L3</i>    | other             | <i>MAP3K2</i>      | other             | <i>SALL2</i>       | other             |
| <i>AK2</i>         | 1                 | <i>DNASE2</i>      | other             | <i>MAPK1</i>       | other             | <i>SAMD9</i>       | 2                 |
| <i>ALG12</i>       | other             | <i>DNER</i>        | other             | <i>MAPK3</i>       | other             | <i>SAMD9L</i>      | 2                 |
| <i>ALPL</i>        | other             | <i>DNMT3B</i>      | 2                 | <i>MAPK9</i>       | other             | <i>SAMHD1</i>      | 7                 |
| <i>ANP32B</i>      | other             | <i>DOCK2</i>       | 1                 | <i>MASP2</i>       | 8                 | <i>SBDS</i>        | 5                 |
| <i>AP1S3</i>       | 7                 | <i>DOCK8</i>       | 1                 | <i>MAVS</i>        | other             | <i>SEMA3E</i>      | 2                 |
| <i>AP3B1</i>       | 4                 | <i>DSC1</i>        | other             | <i>MB21D1</i>      | other             | <i>SERPINA1</i>    | other             |
| <i>AP3B2</i>       | other             | <i>DUSP16</i>      | other             | <i>MBL2</i>        | other             | <i>SERPINB2</i>    | other             |
| <i>AP3D1</i>       | 4                 | <i>EBF1</i>        | other             | <i>MCEE</i>        | other             | <i>SERPINB4</i>    | other             |
| <i>APOBEC3A</i>    | other             | <i>EDIL3</i>       | other             | <i>MCM4</i>        | 2                 | <i>SERPINB6</i>    | other             |
| <i>APOBEC3B</i>    | other             | <i>EEA1</i>        | other             | <i>MCM5</i>        | other             | <i>SERPING1</i>    | 8, 9              |
| <i>APOL1</i>       | 6                 | <i>EGF</i>         | other             | <i>MDC1</i>        | other             | <i>SH2D1A</i>      | 4                 |
| <i>ARHGEF7</i>     | other             | <i>EGR1</i>        | other             | <i>MECP2</i>       | other             | <i>SH3BP2</i>      | 7                 |
| <i>ARPC1B</i>      | 2                 | <i>EHF</i>         | other             | <i>MEF2C</i>       | other             | <i>SHARPIN</i>     | other             |
| <i>ASH1L</i>       | other             | <i>ELANE</i>       | 5                 | <i>MEFV</i>        | 7                 | <i>SKIV2L</i>      | other             |
| <i>ASTN2</i>       | other             | <i>EMB</i>         | other             | <i>MEX3C</i>       | other             | <i>SLC17A5</i>     | other             |
| <i>ATG12</i>       | other             | <i>EPG5</i>        | 2                 | <i>MFN1</i>        | other             | <i>SLC29A3</i>     | 7                 |
| <i>ATG16L1</i>     | other             | <i>ERCC6L2</i>     | 2                 | <i>MFN2</i>        | other             | <i>SLC35C1</i>     | 5                 |
| <i>ATG5</i>        | other             | <i>ETF1</i>        | other             | <i>MGAT5</i>       | other             | <i>SLC37A4</i>     | 5                 |
| <i>ATG7</i>        | other             | <i>ETV6</i>        | other             | <i>MKL1</i>        | 5                 | <i>SLC3A2</i>      | other             |
| <i>ATG9A</i>       | other             | <i>EXTL3</i>       | 2                 | <i>MLH1</i>        | other             | <i>SLC46A1</i>     | 2                 |

|                 |       |                |       |               |       |                 |         |
|-----------------|-------|----------------|-------|---------------|-------|-----------------|---------|
| <i>ATL2</i>     | other | <i>F9</i>      | other | <i>MMP9</i>   | other | <i>SLC7A7</i>   | other   |
| <i>ATM</i>      | 2     | <i>FAAP24</i>  | 4     | <i>MOGS</i>   | 3     | <i>SLC8A1</i>   | other   |
| <i>ATP6AP1</i>  | 3     | <i>FADD</i>    | 4     | <i>MON1A</i>  | other | <i>SLC9A1</i>   | other   |
| <i>ATR</i>      | other | <i>FAS</i>     | 4, 9  | <i>MON1B</i>  | other | <i>SMAD2</i>    | other   |
| <i>AUH</i>      | other | <i>FASLG</i>   | 4     | <i>MRE11A</i> | other | <i>SMAD3</i>    | other   |
| <i>B2M</i>      | 1     | <i>FAT4</i>    | 2     | <i>MS4A1</i>  | 3     | <i>SMAD4</i>    | other   |
| <i>BACH1</i>    | other | <i>FCER2</i>   | other | <i>MSH2</i>   | other | <i>SMARCAL1</i> | 2       |
| <i>BACH2</i>    | 4     | <i>FCGR2A</i>  | other | <i>MSH5</i>   | other | <i>SMARCD2</i>  | 5       |
| <i>BAG3</i>     | other | <i>FCGR3A</i>  | 6     | <i>MSH6</i>   | 3     | <i>SMC3</i>     | other   |
| <i>BCL10</i>    | 1     | <i>FCN3</i>    | 8     | <i>MSN</i>    | 1     | <i>SMURF2</i>   | other   |
| <i>BCL11B</i>   | 1     | <i>FERMT3</i>  | 5     | <i>MTHFD1</i> | 2     | <i>SNAP29</i>   | other   |
| <i>BCL2</i>     | other | <i>FEZ1</i>    | other | <i>MVK</i>    | 7     | <i>SNCA</i>     | other   |
| <i>BDKRB2</i>   | other | <i>FHL2</i>    | other | <i>MX1</i>    | other | <i>SNHG3</i>    | other   |
| <i>BLK</i>      | other | <i>FIS1</i>    | other | <i>MX2</i>    | other | <i>SNX10</i>    | 6       |
| <i>BLM</i>      | 2     | <i>FOS</i>     | other | <i>MYD88</i>  | 6     | <i>SNX5</i>     | other   |
| <i>BLNK</i>     | 3     | <i>FOXH1</i>   | other | <i>MYSM1</i>  | 2     | <i>SOCS2</i>    | other   |
| <i>BLOC1S6</i>  | other | <i>FOXN1</i>   | 2     | <i>NBAS</i>   | 6     | <i>SP110</i>    | 2       |
| <i>BMPR2</i>    | other | <i>FOXP3</i>   | 4     | <i>NBN</i>    | 2     | <i>SP140</i>    | other   |
| <i>BRD4</i>     | other | <i>FPR1</i>    | 5     | <i>NCF1</i>   | 5     | <i>SPINK5</i>   | 2       |
| <i>BTK</i>      | 3     | <i>FPR2</i>    | other | <i>NCF2</i>   | 5     | <i>SQSTM1</i>   | other   |
| <i>BTLA</i>     | other | <i>FPR3</i>    | other | <i>NCF4</i>   | 5     | <i>SRP54</i>    | other   |
| <i>C11orf65</i> | other | <i>FUK</i>     | other | <i>NCSTN</i>  | 6     | <i>ST8SIA5</i>  | other   |
| <i>C1QA</i>     | 8     | <i>G6PC3</i>   | 5     | <i>NFAT5</i>  | 4     | <i>STAT1</i>    | 6       |
| <i>C1QB</i>     | 8     | <i>G6PD</i>    | 5     | <i>NFIC</i>   | other | <i>STAT2</i>    | 6       |
| <i>C1QC</i>     | 8     | <i>GATA2</i>   | 5     | <i>NFIL3</i>  | other | <i>STAT3</i>    | 2, 4, 9 |
| <i>C1R</i>      | 8     | <i>GDA</i>     | other | <i>NFKB1</i>  | 3     | <i>STAT5B</i>   | 2, 9    |
| <i>C1S</i>      | 8     | <i>GDPD4</i>   | other | <i>NFKB2</i>  | 3     | <i>STIM1</i>    | 2       |
| <i>C2</i>       | 8     | <i>GFI1</i>    | 5     | <i>NFKBIA</i> | 2     | <i>STIM2</i>    | other   |
| <i>C3</i>       | 8     | <i>GINS1</i>   | 2     | <i>NHEJ1</i>  | 1     | <i>STK3</i>     | other   |
| <i>C4A</i>      | 8     | <i>GOLGB1</i>  | other | <i>NHP2</i>   | 2     | <i>STK4</i>     | 1       |
| <i>C4B</i>      | 8     | <i>GPATCH2</i> | other | <i>NLRC4</i>  | 7     | <i>STN1</i>     | 2       |
| <i>C5</i>       | 8     | <i>GPC5</i>    | other | <i>NLRP1</i>  | 7     | <i>STX11</i>    | 4       |
| <i>C5AR1</i>    | other | <i>GPRC5A</i>  | other | <i>NLRP12</i> | 7     | <i>STXBP2</i>   | 4       |
| <i>C6</i>       | 8     | <i>GRAP2</i>   | other | <i>NLRP2</i>  | other | <i>SYNCRIP</i>  | other   |
| <i>C7</i>       | 8     | <i>GRIA3</i>   | other | <i>NLRP3</i>  | 7, 9  | <i>TBXT</i>     | other   |
| <i>C8A</i>      | 8     | <i>GTPBP4</i>  | other | <i>NLRX1</i>  | other | <i>TAP1</i>     | 1       |
| <i>C8B</i>      | 8     | <i>HAX1</i>    | 5     | <i>NOD1</i>   | other | <i>TAP2</i>     | 1       |
| <i>C8G</i>      | 8     | <i>HCN1</i>    | other | <i>NOD2</i>   | 7     | <i>TAPBP</i>    | 1       |
| <i>C9</i>       | 8     | <i>HELLS</i>   | 2     | <i>NOP10</i>  | 2     | <i>TAZ</i>      | 5       |

|                |       |                |       |                 |       |                             |       |
|----------------|-------|----------------|-------|-----------------|-------|-----------------------------|-------|
| <i>CAD</i>     | other | <i>HERC5</i>   | other | <i>NQO2</i>     | other | <i>TBC1D15</i>              | other |
| <i>CAMLG</i>   | other | <i>HERC6</i>   | other | <i>NRAS</i>     | 9     | <i>TBC1D16</i>              | other |
| <i>CAPZB</i>   | other | <i>HEXA</i>    | other | <i>NRIP1</i>    | other | <i>TBC1D17</i>              | other |
| <i>CARD11</i>  | 1, 3  | <i>HIVEP1</i>  | other | <i>NSMCE3</i>   | 2     | <i>TBK1</i>                 | 6     |
| <i>CARD14</i>  | 7     | <i>HIVEP2</i>  | other | <i>OAS1</i>     | other | <i>TBX1</i>                 | 2     |
| <i>CARD9</i>   | 6     | <i>HIVEP3</i>  | other | <i>OAS2</i>     | other | <i>TCF3</i>                 | 3     |
| <i>CASP10</i>  | 4     | <i>HK2</i>     | other | <i>OAS3</i>     | other | <i>TCIRG1</i>               | 6     |
| <i>CASP8</i>   | 4     | <i>HMGB1</i>   | other | <i>OASL</i>     | other | <i>TCN2</i>                 | 2     |
| <i>CAV1</i>    | other | <i>HMOX1</i>   | 6     | <i>ORAI1</i>    | 2     | <i>TEK</i>                  | other |
| <i>CCBE1</i>   | 2     | <i>HNRNPLL</i> | other | <i>ORC4</i>     | other | <i>TERT</i>                 | 2     |
| <i>CCDC22</i>  | other | <i>HP</i>      | other | <i>OSTM1</i>    | 6     | <i>TFPI</i>                 | other |
| <i>CCL11</i>   | other | <i>HPCAL1</i>  | other | <i>OTULIN</i>   | 7     | <i>TFRC</i>                 | 1     |
| <i>CCL2</i>    | other | <i>HPR</i>     | other | <i>OVOL2</i>    | other | <i>THBD</i>                 | 8     |
| <i>CCL5</i>    | other | <i>HTR2A</i>   | other | <i>PARN</i>     | 2     | <i>THBS1</i>                | other |
| <i>CCR2</i>    | other | <i>HYOU1</i>   | 5     | <i>PCCA</i>     | other | <i>TICAM1</i>               | 6     |
| <i>CCR5</i>    | other | <i>ICAM1</i>   | other | <i>PCCB</i>     | other | <i>TINF2</i>                | 2     |
| <i>CCZ1</i>    | other | <i>ICOS</i>    | 1     | <i>PDCD1</i>    | other | <i>TIRAP</i>                | 6     |
| <i>CD180</i>   | other | <i>ICOSLG</i>  | other | <i>PDCD1LG2</i> | other | <i>TLR3</i>                 | 6     |
| <i>CD19</i>    | 3     | <i>IDI1</i>    | other | <i>PDE3B</i>    | other | <i>TLR4</i>                 | other |
| <i>CD209</i>   | other | <i>IDI2</i>    | other | <i>PDGFRA</i>   | other | <i>TMC6</i>                 | 6     |
| <i>CD22</i>    | other | <i>IDO2</i>    | other | <i>PDSS2</i>    | other | <i>TMC8</i>                 | 6     |
| <i>CD247</i>   | 1     | <i>IFI35</i>   | other | <i>PEPD</i>     | 4     | <i>TMEM173</i>              | 7     |
| <i>CD27</i>    | 4     | <i>IFIH1</i>   | 6, 7  | <i>PGM3</i>     | 2     | <i>TNF</i>                  | other |
| <i>CD274</i>   | other | <i>IFIT1</i>   | other | <i>PHACTR4</i>  | other | <i>TNFAIP3</i>              | 7     |
| <i>CD276</i>   | other | <i>IFIT2</i>   | other | <i>PIAS1</i>    | other | <i>TNFRSF10A</i>            | other |
| <i>CD300LF</i> | other | <i>IFIT3</i>   | other | <i>PIAS2</i>    | other | <i>TNFRSF11A</i>            | 6     |
| <i>CD34</i>    | other | <i>IFNAR1</i>  | other | <i>PIK3CD</i>   | 3     | <i>TNFRSF11B</i>            | other |
| <i>CD36</i>    | other | <i>IFNAR2</i>  | 6     | <i>PIK3R1</i>   | 3     | <i>TNFRSF13B</i>            | 3     |
| <i>CD37</i>    | other | <i>IFNG</i>    | 9     | <i>PINK1</i>    | other | <i>TNFRSF13C</i>            | 3     |
| <i>CD38</i>    | other | <i>IFNGR1</i>  | 6     | <i>PKHD1</i>    | other | <i>TNFRSF17</i>             | other |
| <i>CD3D</i>    | 1     | <i>IFNGR2</i>  | 6     | <i>PLAU</i>     | other | <i>TNFRSF18</i>             | other |
| <i>CD3E</i>    | 1     | <i>IFNLR1</i>  | other | <i>PLAUR</i>    | other | <i>TNFRSF1A</i>             | 7     |
| <i>CD3G</i>    | 1     | <i>IGHM</i>    | 3     | <i>PLCG1</i>    | other | <i>TNFRSF4</i>              | 1     |
| <i>CD40</i>    | 1     | <i>IGHMBP2</i> | other | <i>PLCG2</i>    | 7     | <i>TNFRSF8</i>              | other |
| <i>CD40LG</i>  | 1     | <i>IGKC</i>    | 3     | <i>PLD1</i>     | other | <i>TNFSF10</i>              | other |
| <i>CD46</i>    | 8     | <i>IGLL1</i>   | 3     | <i>PLEKHM1</i>  | 6     | <i>TNFSF11</i>              | 6     |
| <i>CD5</i>     | other | <i>IKBKB</i>   | 1     | <i>PLK1</i>     | other | <i>TNFSF12</i>              | 3     |
| <i>CD55</i>    | 8     | <i>IKBKG</i>   | 2     | <i>PLXNB1</i>   | other | <i>TNFSF12-<br/>TNFSF13</i> | 3     |
| <i>CD59</i>    | 8     | <i>IKZF1</i>   | 3     | <i>PMM2</i>     | other | <i>TNFSF13B</i>             | other |

|                |       |                |       |                |       |                 |       |
|----------------|-------|----------------|-------|----------------|-------|-----------------|-------|
| <i>CD70</i>    | 4     | <i>IL10</i>    | 4     | <i>PMS2</i>    | 2     | <i>TNIP1</i>    | other |
| <i>CD72</i>    | other | <i>IL10RA</i>  | 4     | <i>PNP</i>     | 2     | <i>TP53</i>     | other |
| <i>CD74</i>    | other | <i>IL10RB</i>  | 4     | <i>PNPLA4</i>  | other | <i>TP53AIP1</i> | other |
| <i>CD79A</i>   | 3     | <i>IL12B</i>   | 6     | <i>PNPT1</i>   | other | <i>TPP1</i>     | 2     |
| <i>CD79B</i>   | 3     | <i>IL12RB1</i> | 6     | <i>POLA1</i>   | 7     | <i>TPP2</i>     | 4     |
| <i>CD81</i>    | 3     | <i>IL17A</i>   | 9     | <i>POLE</i>    | 2     | <i>TRAC</i>     | 1     |
| <i>CD84</i>    | other | <i>IL17F</i>   | 6     | <i>POLE2</i>   | 2     | <i>TRAF3</i>    | 6     |
| <i>CD8A</i>    | 1     | <i>IL17RA</i>  | 6     | <i>PPM1A</i>   | other | <i>TRAF3IP2</i> | 6     |
| <i>CD93</i>    | other | <i>IL17RC</i>  | 6     | <i>PPP2R3B</i> | other | <i>TRAF6</i>    | other |
| <i>CDCA7</i>   | 2     | <i>IL1B</i>    | other | <i>PRF1</i>    | 4     | <i>TRAFD1</i>   | other |
| <i>CDKN1B</i>  | other | <i>IL1RN</i>   | 7     | <i>PRKCB</i>   | other | <i>TREX1</i>    | 7     |
| <i>CEBPB</i>   | other | <i>IL21</i>    | 1     | <i>PRKCD</i>   | 4     | <i>TRIM25</i>   | other |
| <i>CEBPE</i>   | 5     | <i>IL21R</i>   | 1     | <i>PRKCH</i>   | other | <i>TRIM37</i>   | other |
| <i>CENPM</i>   | other | <i>IL22</i>    | 9     | <i>PRKDC</i>   | 1     | <i>TRNT1</i>    | 3     |
| <i>CFB</i>     | 8     | <i>IL2RA</i>   | 4     | <i>PRKN</i>    | other | <i>TRPM2</i>    | other |
| <i>CFD</i>     | 8     | <i>IL2RG</i>   | 1     | <i>PROC</i>    | other | <i>TTC37</i>    | 3     |
| <i>CFH</i>     | 8, 9  | <i>IL3</i>     | other | <i>PRRC2A</i>  | other | <i>TTC7A</i>    | 2     |
| <i>CFHR1</i>   | 8     | <i>IL36RN</i>  | 7     | <i>PSEN1</i>   | 6     | <i>TYK2</i>     | 6     |
| <i>CFHR2</i>   | 8     | <i>IL4</i>     | other | <i>PSENN</i>   | 6     | <i>UBD</i>      | other |
| <i>CFHR3</i>   | 8     | <i>IL4R</i>    | other | <i>PSMA7</i>   | other | <i>UBE2N</i>    | other |
| <i>CFHR4</i>   | 8     | <i>IL6</i>     | 9     | <i>PSMB8</i>   | 7     | <i>UNC119</i>   | other |
| <i>CFHR5</i>   | 8     | <i>IL7</i>     | other | <i>PSTPIP1</i> | 7     | <i>UNC13D</i>   | 4     |
| <i>CFI</i>     | 8     | <i>IL7R</i>    | 1     | <i>PTEN</i>    | 3     | <i>UNC93B1</i>  | 6     |
| <i>CFP</i>     | 8     | <i>INO80</i>   | 3     | <i>PTPN2</i>   | other | <i>UNG</i>      | 3     |
| <i>CFTR</i>    | 5     | <i>INPP5D</i>  | other | <i>PTPRC</i>   | 1     | <i>USB1</i>     | 5     |
| <i>CHD2</i>    | other | <i>IRAK1</i>   | 6     | <i>PTPRN2</i>  | other | <i>USP15</i>    | other |
| <i>CHD7</i>    | 2     | <i>IRAK4</i>   | 6     | <i>PURA</i>    | other | <i>USP18</i>    | 7     |
| <i>CHEK1</i>   | other | <i>IRF2BP2</i> | 3     | <i>RAB27A</i>  | 4     | <i>USP20</i>    | other |
| <i>CIITA</i>   | 1     | <i>IRF3</i>    | 6     | <i>RAB37</i>   | other | <i>USP21</i>    | other |
| <i>CLCN7</i>   | 6     | <i>IRF7</i>    | 6     | <i>RAB5A</i>   | other | <i>USP25</i>    | other |
| <i>CLEC16A</i> | other | <i>IRF8</i>    | 6     | <i>RAB5B</i>   | other | <i>USP3</i>     | other |
| <i>CLPB</i>    | 5     | <i>IRGM</i>    | other | <i>RAB5C</i>   | other | <i>VAPA</i>     | other |
| <i>COG4</i>    | other | <i>ISG15</i>   | 6     | <i>RAB7A</i>   | other | <i>VAV1</i>     | other |
| <i>COG6</i>    | other | <i>ITCH</i>    | 4     | <i>RABGEF1</i> | other | <i>VCP</i>      | other |
| <i>COMMD6</i>  | other | <i>ITGAM</i>   | other | <i>RAC2</i>    | 5     | <i>VDAC1</i>    | other |
| <i>COPA</i>    | 7     | <i>ITGB2</i>   | 5     | <i>RAD50</i>   | other | <i>VDR</i>      | other |
| <i>CORO1A</i>  | 1     | <i>ITK</i>     | 4     | <i>RAD51</i>   | other | <i>VEGFA</i>    | other |
| <i>CR2</i>     | 3     | <i>ITPKB</i>   | other | <i>RAG1</i>    | 1     | <i>VPS13B</i>   | 5     |
| <i>CRADD</i>   | other | <i>ITSN1</i>   | other | <i>RAG2</i>    | 1     | <i>VPS45</i>    | 5     |

|               |       |                |       |                |       |               |       |
|---------------|-------|----------------|-------|----------------|-------|---------------|-------|
| <i>CRTC3</i>  | other | <i>ITSN2</i>   | other | <i>RANBP2</i>  | 6     | <i>VSTM1</i>  | other |
| <i>CSF2</i>   | 9     | <i>JAGN1</i>   | 5     | <i>RASGRP1</i> | 4     | <i>VWA2</i>   | other |
| <i>CSF2RA</i> | 5     | <i>JAK1</i>    | 4, 6  | <i>RBCK1</i>   | 2     | <i>WAS</i>    | 2, 5  |
| <i>CSF2RB</i> | 5     | <i>JAK3</i>    | 1     | <i>RBFOX1</i>  | other | <i>WASHC5</i> | other |
| <i>CSF3R</i>  | 5     | <i>JMY</i>     | other | <i>RCC1</i>    | other | <i>WDR1</i>   | 5     |
| <i>CTC1</i>   | 2     | <i>JUN</i>     | other | <i>RELA</i>    | other | <i>WEE1</i>   | other |
| <i>CTLA4</i>  | 4     | <i>KANK1</i>   | other | <i>RELB</i>    | 1     | <i>WIPF1</i>  | 2     |
| <i>CTPS1</i>  | 4     | <i>KAT6B</i>   | other | <i>RFX5</i>    | 1     | <i>WRAP53</i> | 2     |
| <i>CTSC</i>   | 5     | <i>KCTD7</i>   | other | <i>RFXANK</i>  | 1     | <i>XAF1</i>   | other |
| <i>CX3CR1</i> | other | <i>KDM6A</i>   | 2     | <i>RFXAP</i>   | 1     | <i>XIAP</i>   | 4     |
| <i>CXCL1</i>  | other | <i>KITLG</i>   | other | <i>RGCC</i>    | other | <i>YBX1</i>   | other |
| <i>CXCL10</i> | other | <i>KMT2D</i>   | 2     | <i>RHOH</i>    | 1     | <i>YWHAZ</i>  | other |
| <i>CXCL12</i> | other | <i>KRAS</i>    | 9     | <i>RHOQ</i>    | other | <i>ZAP70</i>  | 1, 4  |
| <i>CXCL5</i>  | other | <i>LAMTOR2</i> | 5     | <i>RIPK1</i>   | other | <i>ZBTB24</i> | 2     |
| <i>CXCL8</i>  | other |                |       |                |       |               |       |

\* International Union of Immunological Societies (IUIS) genes causing inborn errors of immunity were curated from Picard C. et al. J Clin Immunol. 2018 Jan;38(1):96-128 (PMID 29226302), Bousfiha A. et al. J Clin Immunol. 2018 Jan;38(1):129-143 (PMID 29226301). IUIS table numbers reference the Picard et al. 2018 table(s) in which the gene is found and other indicates an immune function gene curated from other sources (see Methods for details).

**SUPPLEMENTARY TABLE 2** | Variant burden filtering criteria and results for 669 immune function genes or all genes\*

| Filter                                | Selection                  | 669 het EUR  |              | 669 het AFR  |              | 669 het EUR+AFR |              |
|---------------------------------------|----------------------------|--------------|--------------|--------------|--------------|-----------------|--------------|
|                                       |                            | Dis variants | Rep variants | Dis variants | Rep variants | Dis variants    | Rep variants |
| none                                  | none                       | 16496        | 20785        | 16496        | 20785        | 16496           | 20785        |
| IMPACT                                | HIGH, MODERATE             | 2547         | 3127         | 2547         | 3127         | 2547            | 3127         |
| gnomAD frequency                      | <= 0.05                    | 1437         | 1956         | 1437         | 1956         | 1437            | 1956         |
| PML_ALT [EUR, AFR, EUR+AFR]           | >= 2, >= 1, >= 3           | 181          | 298          | 653          | 843          | 99              | 196          |
| OR                                    | > 1                        | 170          | 243          | 642          | 783          | 99              | 161          |
| p-value                               | <= 0.1                     | 67           | 73           | 323          | 360          | 53              | 68           |
| Overlap Dis Rep                       |                            | 8            |              | 9            |              | 9               |              |
| Technical rank = 1                    |                            | 7            |              | 9            |              | 9               |              |
| Biology rank = 1                      |                            | 7            |              | 9            |              | 9               |              |
| >= 1 EUR and AFR and >= 1 Dis and Rep |                            | n/a          |              | n/a          |              | 1               |              |
|                                       |                            |              |              |              |              |                 |              |
| Filter                                | Selection                  | All het EUR  |              | All het AFR  |              | All het EUR+AFR |              |
|                                       |                            | Dis variants | Rep variants | Dis variants | Rep variants | Dis variants    | Rep variants |
| none                                  | none                       | 338213       | 431195       | 338213       | 431195       | 338213          | 431195       |
| IMPACT                                | HIGH, MODERATE             | 65712        | 84726        | 65712        | 84726        | 65712           | 84726        |
| gnomAD frequency                      | <= 0.05                    | 33414        | 50479        | 33414        | 50479        | 33414           | 50479        |
| PML_ALT [EUR, AFR, EUR+AFR]           | >= 3, >= 1, >= 3           | 1271         | 3672         | 15884        | 21907        | 2057            | 5105         |
| OR                                    | >1                         | 1271         | 3187         | 15702        | 20291        | 363             | 484          |
| p-value [EUR, AFR, EUR+AFR]           | <= 0.05, <= 0.005, <= 0.01 | 367          | 582          | 1685         | 1528         | 363             | 484          |
| Overlap Dis Rep                       |                            | 22           |              | 15           |              | 13              |              |
| Technical rank = 1                    |                            | 7            |              | 10           |              | 4               |              |
| Biology rank = 1                      |                            | 2            |              | 1            |              | 0               |              |

\* Variant numbers in the Dis and Rep cohorts are identical for EUR, AFR, and EUR+AFR filtered subgroups until an ethnic specific filter (PML\_ALT) is applied

**SUPPLEMENTARY TABLE 3** | Comparison of statistical analyses for the combined PML cohorts using four control data sets.\*

| Variant (hg19)   | Ethnicity | PML cases | gnomAD GE+GG subjects | p-value  | OR      | gnomAD GE subjects | p-value  | OR     | gnomAD GG subjects | p-value  | OR     | TGP Exome subjects | p-value  | OR    |
|------------------|-----------|-----------|-----------------------|----------|---------|--------------------|----------|--------|--------------------|----------|--------|--------------------|----------|-------|
| 22-23915745-G-A  | EUR       | 3/136     | 0/48/64410            | 1.77E-04 | 30.23   | 0/42/56703         | 1.77E-04 | 30.42  | 0/6/7707           | 3.97E-04 | 28.88  | 0/0/436            | 1.32E-02 | 22.89 |
| 6-30673359-T-G   | EUR       | 8/136     | 0/347/60562           | 1.55E-06 | 10.85   | 0/302/54608        | 1.21E-06 | 11.24  | 0/45/5954          | 1.91E-05 | 8.20   | 0/4/426            | 1.98E-03 | 6.57  |
| 19-7712287-G-C   | EUR       | 4/136     | 0/311/63507           | 4.81E-03 | 6.16    | 0/267/55798        | 4.46E-03 | 6.30   | 0/44/7709          | 9.32E-03 | 5.28   | 0/1/414            | 1.46E-02 | 12.45 |
| 9-137779251-G-A  | EUR       | 6/136     | 2/505/64168           | 8.21E-04 | 5.79    | 1/461/56457        | 9.85E-04 | 5.59   | 1/44/7711          | 2.30E-04 | 7.86   | 0/3/435            | 7.30E-03 | 6.62  |
| 22-35806756-G-A  | EUR       | 7/136     | 7/736/64588           | 1.10E-03 | 4.66    | 7/665/56875        | 1.28E-03 | 4.54   | 0/71/7713          | 3.81E-04 | 5.84   | 0/5/436            | 9.97E-03 | 4.66  |
| 22-23915583-T-C  | EUR       | 5/136     | 0/541/64515           | 6.14E-03 | 4.51    | 0/446/56811        | 4.70E-03 | 4.82   | 0/95/7704          | 2.96E-02 | 3.06   | 0/4/434            | 3.93E-02 | 4.09  |
| 2-163136505-C-G  | EUR       | 11/136    | 6/1367/64143          | 1.86E-04 | 4.02    | 6/1225/56438       | 2.19E-04 | 3.95   | 0/142/7705         | 6.53E-05 | 4.69   | 0/15/436           | 3.23E-02 | 2.47  |
| 16-81939089-T-C  | EUR       | 5/136     | 3/610/64302           | 1.03E-02 | 3.97    | 3/533/56593        | 1.00E-02 | 3.99   | 0/77/7709          | 1.37E-02 | 3.78   | 0/4/277            | 1.63E-01 | 2.60  |
| 16-81942175-A-G  | EUR       | 6/136     | 2/934/64000           | 1.56E-02 | 3.11    | 2/831/56290        | 1.64E-02 | 3.07   | 0/103/7710         | 1.15E-02 | 3.41   | 0/11/279           | 7.97E-01 | 1.12  |
| 1-160769595-AG-A | AFR       | 2/49      | 0/0/12479             | 1.50E-05 | 1313.63 | 0/0/8123           | 3.52E-05 | 855.11 | 0/0/4356           | 1.21E-04 | 458.58 | 0/0/440            | 9.86E-03 | 46.37 |
| 19-48643270-C-T  | AFR       | 2/49      | 0/10/12484            | 9.64E-04 | 52.87   | 0/1/8126           | 1.05E-04 | 339.72 | 0/9/4358           | 6.25E-03 | 20.49  | 0/0/440            | 9.86E-03 | 46.37 |
| 6-51798908-C-T   | AFR       | 3/49      | 0/17/12485            | 6.11E-05 | 47.68   | 0/15/8127          | 1.55E-04 | 35.15  | 0/2/4358           | 1.27E-05 | 140.77 | 0/2/440            | 8.21E-03 | 14.12 |
| 21-45708278-G-A  | AFR       | 2/49      | 0/23/12433            | 4.28E-03 | 22.94   | 0/17/8079          | 5.70E-03 | 20.14  | 0/6/4354           | 3.26E-03 | 30.67  | 0/3/440            | 8.09E-02 | 6.15  |
| 1-92946625-G-C   | AFR       | 2/49      | 0/30/12105            | 7.31E-03 | 17.11   | 0/19/7756          | 7.51E-03 | 17.29  | 0/11/4349          | 8.77E-03 | 16.73  | 0/0/367            | 1.36E-02 | 38.68 |
| 6-3015818-G-A    | AFR       | 3/49      | 0/54/12484            | 1.42E-03 | 15.00   | 0/39/8128          | 1.97E-03 | 13.51  | 0/15/4356          | 9.39E-04 | 18.81  | 0/1/440            | 3.53E-03 | 28.19 |
| 1-57409459-C-A   | AFR       | 2/49      | 0/38/12483            | 1.06E-02 | 13.93   | 0/28/8128          | 1.38E-02 | 12.29  | 0/10/4355          | 7.46E-03 | 18.42  | 0/0/440            | 9.86E-03 | 46.37 |
| 1-196918605-A-G  | AFR       | 3/49      | 0/58/12384            | 1.76E-03 | 13.85   | 0/37/8027          | 1.77E-03 | 14.07  | 0/21/4357          | 2.22E-03 | 13.43  | 0/0/440            | 9.51E-04 | 66.31 |
| 3-58191230-G-T   | AFR       | 2/49      | 0/44/12483            | 1.39E-02 | 12.02   | 0/32/8126          | 1.75E-02 | 10.75  | 0/12/4357          | 1.01E-02 | 15.37  | 0/0/440            | 9.86E-03 | 46.37 |
| 11-67818269-G-A  | AFR       | 7/49      | 2/490/12463           | 3.09E-03 | 4.05    | 1/318/8113         | 3.08E-03 | 4.07   | 1/172/4350         | 3.42E-03 | 4.02   | 0/20/438           | 1.25E-02 | 3.47  |
| 16-81942175-A-G  | AFR       | 5/49      | 0/194/12067           | 1.21E-03 | 6.95    | 0/128/7719         | 1.42E-03 | 6.73   | 0/66/4348          | 1.05E-03 | 7.36   | 0/4/415            | 9.82E-04 | 11.55 |
| 16-81942175-A-G  | EUR+AFR   | 11/185    | 2/1128/76067          | 1.22E-04 | 4.19    | 2/959/64009        | 1.34E-04 | 4.15   | 0/169/12058        | 8.97E-05 | 4.45   | 0/15/694           | 1.25E-02 | 2.86  |

\* Allele data for gnomAD (GE+GG, GE, GG) and TGP Exome are reported as homozygotes/heterozygotes/total subjects (allele number/2)



**SUPPLEMENTARY TABLE 4** | Functional impact of PML-associated variant burden variants and immune dysfunction evidence

| Gene symbol     | IUIS Gene <sup>a</sup> | Variant (hg19)   | gnomAD <sup>b</sup> AF EUR | gnomAD <sup>b</sup> AF AFR | dbSNP ID    | Consequence  | Impact   | PolyPhen          | SIFT        | MutationTaster | Immune Dysfunction (PMID) <sup>c</sup> |
|-----------------|------------------------|------------------|----------------------------|----------------------------|-------------|--------------|----------|-------------------|-------------|----------------|----------------------------------------|
| <i>AIRE</i>     | yes                    | 21-45708278-G-A  | 3.89E-05                   | 9.25E-04                   | rs148012328 | p.Gly197Arg  | moderate | probably damaging | tolerated   | deleterious    | 27504588, 29483906                     |
| <i>C8B</i>      | yes                    | 1-57409459-C-A   | 6.12E-03                   | 1.52E-03                   | rs139498867 | p.Asp382Tyr  | moderate | possibly damaging | deleterious | neutral        | 22773339                               |
| <i>CFHR2</i>    | yes                    | 1-196918605-A-G  | 0.00E+00                   | 2.34E-03                   | rs148175483 | p.Lys27Glu   | moderate | benign            | tolerated   | neutral        | 22773339, 23830046                     |
| <i>DNASE1L3</i> | no                     | 3-58191230-G-T   | 2.48E-03                   | 1.76E-03                   | rs12491947  | p.Asn96Lys   | moderate | benign            | tolerated   | neutral        | 28533778, 28990587                     |
| <i>FCN2</i>     | no                     | 9-137779251-G-A  | 3.97E-03                   | 6.42E-04                   | rs76267164  | p.Arg311Gln  | moderate | probably damaging | deleterious | deleterious    | 25251245, 28894916                     |
| <i>GFI1</i>     | yes                    | 1-92946625-G-C   | 3.53E-03                   | 1.24E-03                   | rs149914857 | p.Pro107Ala  | moderate | benign            | tolerated   | deleterious    | 26447191, 31004086                     |
| <i>IFIH1</i>    | yes                    | 2-163136505-C-G  | 1.08E-02                   | 2.81E-03                   | rs35337543  | splice donor | high     | n/a               | n/a         | deleterious    | 28606988, 28716935*                    |
| <i>IGLL1</i>    | yes                    | 22-23915583-T-C  | 4.19E-03                   | 7.23E-03                   | rs1064421   | p.Asn171Ser  | moderate | benign            | tolerated   | deleterious    | 31291582                               |
| <i>IGLL1</i>    | yes                    | 22-23915745-G-A  | 3.73E-04                   | 5.49E-03                   | rs143780139 | p.Thr117Ile  | moderate | benign            | deleterious | deleterious    | 31291582                               |
| <i>LIG1</i>     | yes                    | 19-48643270-C-T  | 2.39E-03                   | 4.01E-04                   | rs3730947   | p.Val349Met  | moderate | possibly damaging | deleterious | deleterious    | 30395541                               |
| <i>LY9</i>      | no                     | 1-160769595-AG-A | 6.20E-05                   | 0.00E+00                   | rs763811636 | frameshift   | high     | n/a               | n/a         | n/a            | 30791129                               |
| <i>MCM5</i>     | no                     | 22-35806756-G-A  | 5.81E-03                   | 8.41E-04                   | rs2230933   | p.Val258Ile  | moderate | possibly damaging | tolerated   | deleterious    | 27414250, 29921932                     |
| <i>MDC1</i>     | no                     | 6-30673359-T-G   | 2.87E-03                   | 8.02E-03                   | rs143258964 | p.Thr1201Pro | moderate | benign            | tolerated   | neutral        | 29921932, 30453211                     |
| <i>NQO2</i>     | no                     | 6-3015818-G-A    | 1.55E-05                   | 2.16E-03                   | rs148024596 | p.Val120Met  | moderate | probably damaging | deleterious | deleterious    | 29934320                               |
| <i>PKHD1</i>    | no                     | 6-51798908-C-T   | 2.33E-05                   | 6.81E-04                   | rs199589074 | p.Gly2041Ser | moderate | probably damaging | deleterious | deleterious    | 27225849*, 29140564                    |
| <i>PLCG2</i>    | yes                    | 16-81939089-T-C  | 4.79E-03                   | 7.45E-04                   | rs187956469 | p.Tyr482His  | moderate | possibly damaging | tolerated   | deleterious    | 25349203*, 29538758                    |
| <i>PLCG2</i>    | yes                    | 16-81942175-A-G  | 7.33E-03                   | 8.04E-03                   | rs75472618  | p.Asn571Ser  | moderate | benign            | deleterious | deleterious    | 25349203*, 26206677                    |
| <i>STXBP2</i>   | yes                    | 19-7712287-G-C   | 2.45E-03                   | 3.75E-04                   | rs35490401  | p.Arg529Pro  | moderate | probably damaging | deleterious | deleterious    | 24916509, 29599780                     |
| <i>TCIRG1</i>   | yes                    | 11-67818269-G-A  | 1.61E-03                   | 1.98E-02                   | rs75596506  | p.Ala826Thr  | moderate | benign            | tolerated   | neutral        | 30837952                               |

<sup>a</sup> International Union of Immunological Societies (IUIS) genes causing inborn errors of immunity were curated from Picard C. et al. J Clin Immunol. 2018 Jan;38(1):96-128 (PMID 29226302) and Bousfiha A. et al. J Clin Immunol. 2018 Jan;38(1):129-143 (PMID 29226301).

<sup>b</sup> Allele Frequency (AF) in gnomAD subjects (genomes + exomes) for EUR (non-Finnish Europeans) and AFR ethnicities.

<sup>c</sup> PubMed ID (PMID) numbers for example studies or reviews that provide additional supporting evidence of immune dysfunction for the PML-associated genes; PMID marked with an asterisk (\*) report on the specific variant.
